# Supplementary material for: Score Predicting Acute Chest Syndrome During Vaso-occlusive Crises in Adult Sickle-cell Disease Patients
Source: PubMed Central journal article supplement — eBioMedicine. 2016 Jun 29;10:305–11. doi: 10.1016/j.ebiom.2016.06.038 (PMC5006640; doi:10.1016/j.ebiom.2016.06.038), 2016-06-29

**Supplementary Table S1: Acute chest syndrome predictive score**

| <b>Parameters</b>                 | <b>Points</b>              |
|-----------------------------------|----------------------------|
| <hr/>                             |                            |
| Spine and/or pelvis CPS           |                            |
| 0 or 1                            | 0                          |
| 2                                 | 4                          |
| 3                                 | 5                          |
| Reticulocytes ( $\times 10^9/L$ ) |                            |
| $\leq 216$                        | 0                          |
| $> 216$                           | 7                          |
| Leukocytes ( $\times 10^9/L$ )    |                            |
| $\leq 11$                         | 0                          |
| $> 11$                            | 3                          |
| Hemoglobin (g/dL)                 |                            |
| $> 9$                             | 0                          |
| $\leq 9$                          | 1                          |
| <hr/>                             |                            |
| Total                             |                            |
|                                   | $\geq 11$ High risk of ACS |
|                                   | 6–10 Intermediate          |
|                                   | $\leq 5$ Low risk of ACS   |
| <hr/>                             |                            |

**Supplementary Figure S1: Receiver operating characteristics curve for the ACS-predictive score**

AUC=area under the curve.

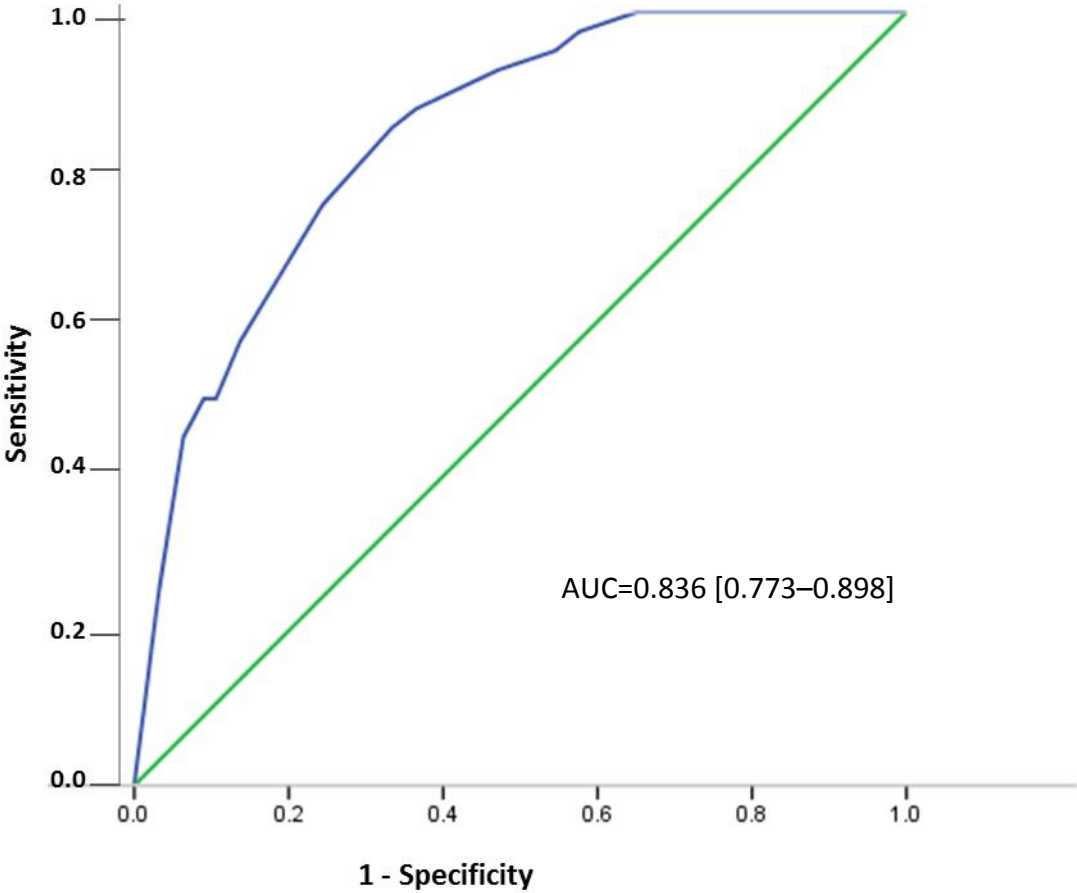

Supplement: mmc1.pdf [file mmc1.pdf]
